# Supplementary material for: Dimethyl sulfide and its role in aerosol formation and growth in the Arctic summer – a modelling study
Source: Copernicus journal article supplement (doi:10.5194/acp-19-14455-2019), 2019-11-29
Supplement: Supplementary file 2 [file acp-19-14455-2019-supplement.pdf]

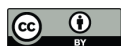

*Supplement of*

## **Dimethyl sulfide and its role in aerosol formation and growth in the Arctic summer – a modelling study**

**Roghayeh Ghahremaninezhad et al.**

*Correspondence to:* Roghayeh Ghahremaninezhad ([roghayeh.ghahremaninezhad@canada.ca](mailto:roghayeh.ghahremaninezhad@canada.ca))

The copyright of individual parts of the supplement might differ from the CC BY 4.0 License.

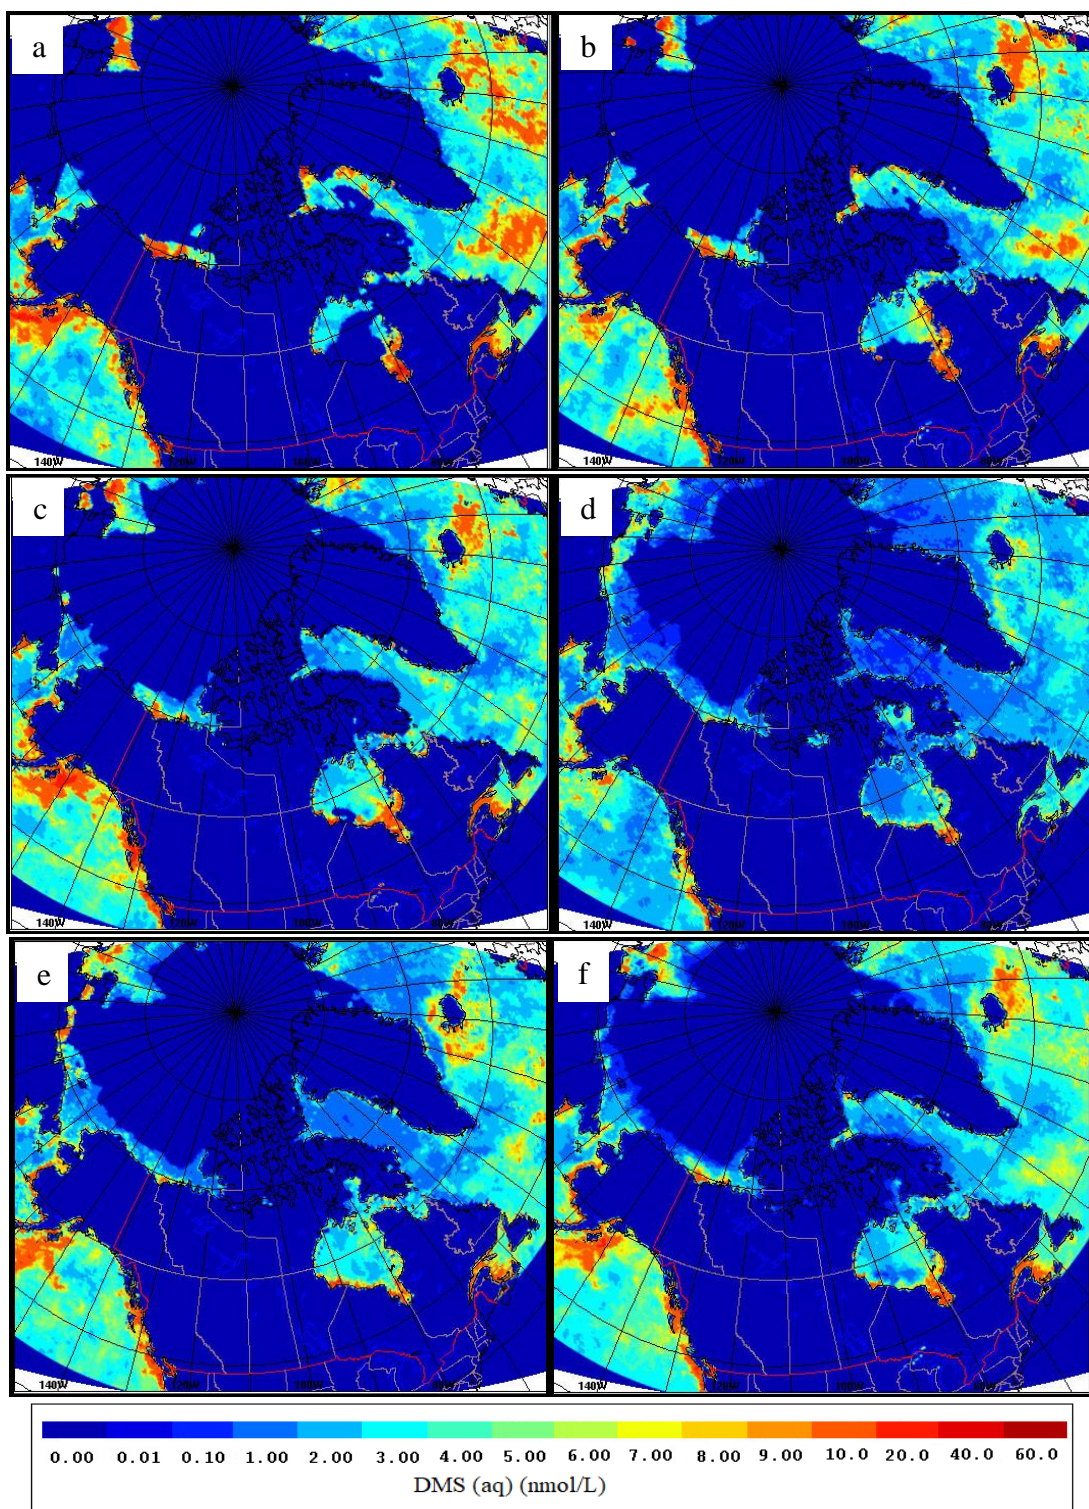

Figure S1: SAT DMS(aq) (nmol/L) for a. July 1<sup>st</sup> to 3<sup>rd</sup>, b. July 4<sup>th</sup> to 11<sup>th</sup>, c. July 12<sup>th</sup> to 19<sup>th</sup>, d. July 20<sup>th</sup> to July 27<sup>th</sup>, e. July 28<sup>th</sup> to August 4<sup>th</sup>, and f. August 5<sup>th</sup> to 8<sup>th</sup>, 2014.

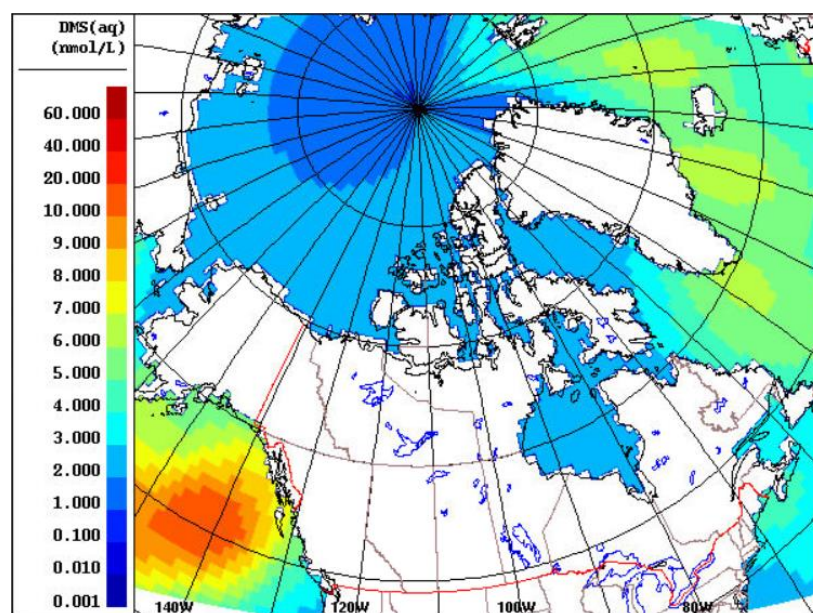

Figure S2: August average of the CLIM11 DMS(aq) concentrations (nmol/L).



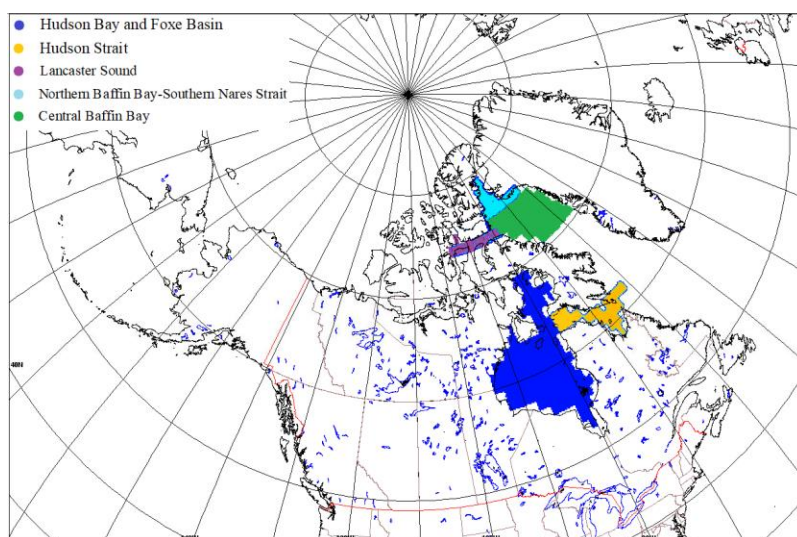

**Figure S3. Locations with the updated CLIM11 DMS(aq) concentration values for the HS-HB and CLIM11+ave-Obs sensitivity runs.**

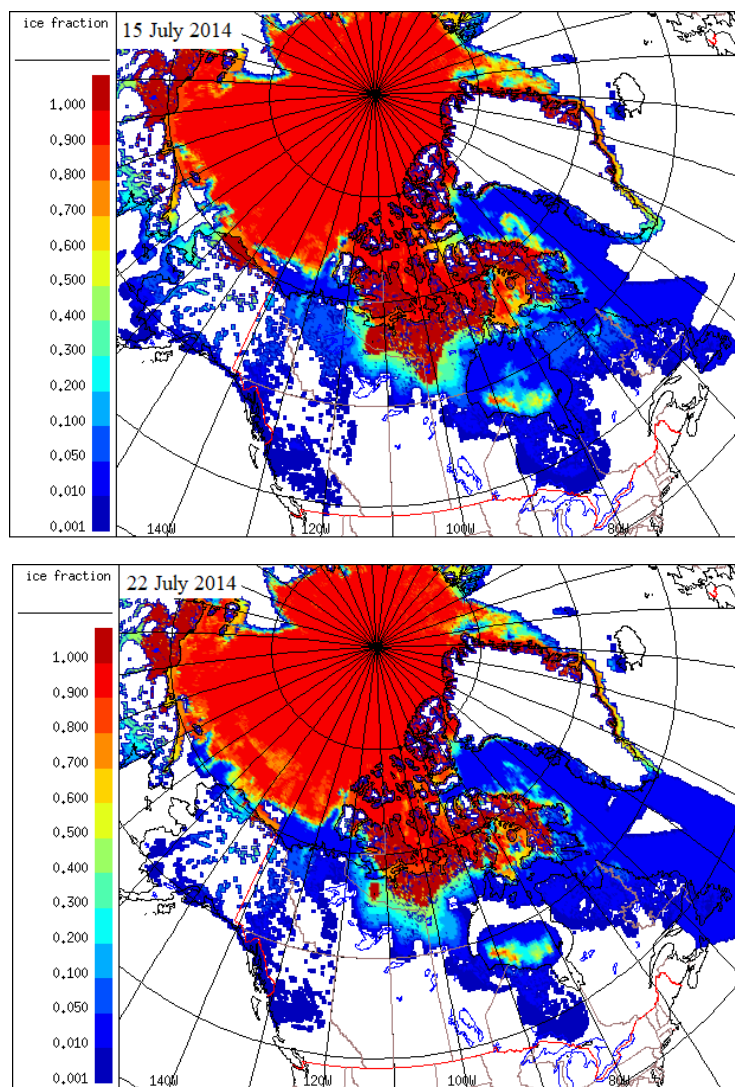

**Figure S4: Ice fraction for July 15<sup>th</sup> (upper panel) and July 22<sup>nd</sup> (lower panel), 2014.**
